# Supplementary material
Source: PubMed Central journal article supplement (PMC7172451)
Supplement: mmc1.pdf [file mmc1.pdf]

## Recommendations for treatment of childhood non-severe pneumonia

|                                            | Study location                              | Age                        | Study design         | Outcome measure          | Antimicrobial agents (number with outcome/total)                                                                                                                                                             | Conclusions                                                                                                                                                                 |                                                                                                                                                                                                          |
|--------------------------------------------|---------------------------------------------|----------------------------|----------------------|--------------------------|--------------------------------------------------------------------------------------------------------------------------------------------------------------------------------------------------------------|-----------------------------------------------------------------------------------------------------------------------------------------------------------------------------|----------------------------------------------------------------------------------------------------------------------------------------------------------------------------------------------------------|
| <b>Comparisons of antimicrobial agents</b> |                                             |                            |                      |                          |                                                                                                                                                                                                              |                                                                                                                                                                             |                                                                                                                                                                                                          |
|                                            | Hazir et al (2008) <sup>1</sup>             | Pakistan                   | 3–59 months          | Randomised, open label   | Treatment failure at day 6                                                                                                                                                                                   | Ampicillin at 48 h + amoxicillin at 3 days: 889/976; amoxicillin at 5 days: 911/988                                                                                         | Home treatment with high-dose oral amoxicillin is equivalent to currently recommended hospitalisation and parenteral ampicillin for treatment of severe pneumonia without underlying complications       |
|                                            | Bradley et al (2007) <sup>2</sup>           | Multicentre, international | 6–59 months          | Randomised, open label   | Clinical cure at 10–17 days after completion of therapy                                                                                                                                                      | Levofloxacin: 211/247; amoxicillin–clavulanic acid or ceftriaxone: 71/87                                                                                                    | In children treated either in hospital or as an outpatient for community-acquired pneumonia, levofloxacin was as well-tolerated and as effective as standard-of-care antibiotics in infants and children |
|                                            | Atkinson et al (2007) <sup>3</sup>          | USA                        | 6 months to 16 years | Randomised               | Treatment failure                                                                                                                                                                                            | Amoxicillin (by mouth): 3/98; benyl penicillin: 7/98                                                                                                                        | In children hospitalised with radiographically confirmed pneumonia, there was no significant difference in outcome in children receiving each treatment                                                  |
|                                            | Lu et al (2006) <sup>4</sup>                | China                      | ..                   | Randomised, open label   | Favourable treatment response                                                                                                                                                                                | Cefaclor: 94/110; amoxicillin–clavulanic acid: 91/110                                                                                                                       | For children with lower respiratory tract infections, there is no significant difference between the two treatments                                                                                      |
|                                            | Bansal et al (2006) <sup>5</sup>            | India                      | 2–59 months          | Randomised, open label   | Relapse of pneumonia within 2 weeks, persistence of danger signs at 48 h or deterioration                                                                                                                    | Amoxicillin–clavulanic acid: 1/23; penicillin and gentamicin: 1/21                                                                                                          | In children with severe or very severe radiographically confirmed hypoxemic pneumonia, there was no significant difference between the two treatments                                                    |
|                                            | Hasali et al (2005) <sup>6</sup>            | Malaysia                   | 2 months to 5 years  | Randomised, open label   | Improvement of signs and symptoms                                                                                                                                                                            | Ampicillin (intravenous): 20/20; ampicillin and gentamicin: 20/20                                                                                                           | In children hospitalised with severe pneumonia, there were significant differences in time to desired outcome, favouring the ampicillin group, but all children recovered                                |
|                                            | Cetinkaya et al (2004) <sup>7</sup>         | Turkey                     | 2–24 months          | Randomised, double blind | Cure: “all symptoms and signs related to pneumonia had completely disappeared”                                                                                                                               | Penicillin G + chloramphenicol: 39/46; ceftriaxone: 41/51                                                                                                                   | For children with severe pneumonia, both treatments are successful regimens for treatment of severe pneumonia                                                                                            |
|                                            | Addo-Yobo et al (2004) <sup>8</sup>         | Multicentre, international | 3–59 months          | Randomised, open label   | Treatment failure up to 48 h based on clinical signs                                                                                                                                                         | Amoxicillin: 161/857; penicillin G: 167/845                                                                                                                                 | For children with severe pneumonia, penicillin and amoxicillin are equivalent                                                                                                                            |
|                                            | Aurangzeb and Hameed (2003) <sup>9</sup>    | Pakistan                   | 2–72 months          | Randomised               | Clinical improvement                                                                                                                                                                                         | Amoxicillin: 41/43; cefuroxime: 40/41; clarithromycin: 39/41                                                                                                                | For children with severe pneumonia, all antibiotics had similar outcomes, although amoxicillin was significantly less expensive                                                                          |
|                                            | Kogan et al (2003) <sup>10</sup>            | Chile                      | 1 month to 14 years  | Randomised               | Classic pneumonia: A=No fever at day 3; B=Improvement of ≥75% of radiographic baseline on day 7<br>Atypical pneumonia: A=Number of days with cough; B=Improvement of ≥75% of radiographic baseline on day 14 | Classic pneumonia (A, B): azithromycin, (21,19)/23; amoxicillin, (21,15)/24;<br>atypical pneumonia (A, B): azithromycin, (3-6 days, 33)/33; erythromycin, (5-5 days, 21)/26 | For children with severe pneumonia, there is no difference in treatment except with duration of cough in the atypical group                                                                              |
|                                            | Duke et al (2002) <sup>11</sup>             | Papua New Guinea           | 1 month to 5 years   | Randomised, open label   | Treatment failure on management                                                                                                                                                                              | Chloramphenicol: 147/559; penicillin and gentamicin: 123/557                                                                                                                | For children with very severe pneumonia, for both treatment groups resulted in good outcomes                                                                                                             |
|                                            | CATCHUP et al (2002) <sup>12</sup>          | Pakistan                   | 2–59 months          | Randomised, double blind | Treatment failure on clinical signs on days 3 or 5                                                                                                                                                           | Amoxicillin: 117/725; co-trimoxazole: 139/734                                                                                                                               | For children with non-severe pneumonia, both treatments are equally effective                                                                                                                            |
|                                            | Ferwerda et al (2001) <sup>13</sup>         | Netherlands                | 3 months to 12 years | Randomised, double blind | Clinical cure at follow-up (day 10–13 after initiation of therapy)                                                                                                                                           | Azithromycin: 41/56; amoxicillin–clavulanic acid: 37/54                                                                                                                     | For children with radiographically confirmed pneumonia, there was no significant difference between treatments, although azithromycin was better tolerated                                               |
|                                            | Vuori-Holopainen et al (2001) <sup>14</sup> | Finland                    | 3 months to 15 years | Randomised, open label   | “Uneventful recovery”                                                                                                                                                                                        | Procaine penicillin: 41/41; Cefuroxime (intravenously): 30/31                                                                                                               | For children with pneumonia (study included children with other diagnosis), there was no significant difference between the two outcomes                                                                 |
|                                            | Boulesteix et al (2000) <sup>15</sup>       | France                     | 3 months to 15 years | Randomised               | Clinical and radiological response                                                                                                                                                                           | Cefuroxime: 37/40; cefpodoxime: 41/44                                                                                                                                       | In children hospitalised with radiographically confirmed pneumonia, there was no significant difference in treatment between the two treatments                                                          |

(Continues on next page)

Correspondence to:  
Gavin Bayan Grant,  
1600 Clifton Road NE, MS E-05,  
Atlanta, GA 30333, USA  
gbgrant@cdc.gov

|                                             | Study location   | Age                                                        | Study design                                   | Outcome measure                                                                                                                            | Antimicrobial agents (number with outcome/total)                                                      | Conclusions                                                                                                                                                                     |
|---------------------------------------------|------------------|------------------------------------------------------------|------------------------------------------------|--------------------------------------------------------------------------------------------------------------------------------------------|-------------------------------------------------------------------------------------------------------|---------------------------------------------------------------------------------------------------------------------------------------------------------------------------------|
| (Continued from previous page)              |                  |                                                            |                                                |                                                                                                                                            |                                                                                                       |                                                                                                                                                                                 |
| Wubbel et al (1999) <sup>16</sup>           | USA              | 6 months to 16 years (results given only for ≤5-year olds) | Randomised, not blinded                        | Treatment failure: persistence or progression after 3 days of treatment                                                                    | Azithromycin: 1/39; amoxicillin-clavulanic acid: 2/49                                                 | For the children with radiographically confirmed pneumonia, there was no significant differences between the two treatment groups                                               |
| Harris et al (1998) <sup>17</sup>           | USA              | 6 months to 16 years (results given only for ≤5 year olds) | Randomised, double blind                       | Treatment failure: persistence or progression after 3 days of treatment                                                                    | Azithromycin: 41/125; amoxicillin-clavulanic acid: 21/63                                              | For children with radiographically confirmed pneumonia, there was no significant difference between the two treatment groups                                                    |
| Tsarouhas et al (1998) <sup>18</sup>        | USA              | 6 months to 18 years                                       | Randomised, evaluator blinded                  | Temperature, respiratory rate, and general appearance score                                                                                | Amoxicillin: 3/90; penicillin G: 5/71                                                                 | No significant difference between intramuscular and oral treatments at 24–36 h                                                                                                  |
| Straus et al (1998) <sup>19</sup>           | Pakistan         | 2–59 months                                                | Randomised, double blind, placebo (for dosing) | Inpatient: clinical failure; outpatient: signs of clinical pneumonia at follow-up                                                          | Co-trimoxazole: 92/398; amoxicillin: 30/197                                                           | For children with severe pneumonia, co-trimoxazole was statistically less effective than amoxicillin<br>For children with non-severe pneumonia, co-trimoxazole was as effective |
| Carmargos et al (1997) <sup>20</sup>        | Brazil           | 2–12 years                                                 | Randomised, single blind                       | Lack of progressive radiographic improvement on days 2, 7, and 14                                                                          | Benzathine penicillin: 7/91; procaine penicillin: 4/82                                                | For children with radiographically confirmed pneumonia, there was no significant difference between treatment groups                                                            |
| Roord et al (1996) <sup>21</sup>            | Netherlands      | 2–16 years                                                 | Randomised, open label                         | Resolution of clinical signs and symptoms of lower respiratory tract infection                                                             | Azithromycin: 43/44; erythromycin: 36/40                                                              | For children lower respiratory tract infections, azithromycin is as effective as erythromycin                                                                                   |
| Galova et al (1996) <sup>22</sup>           | Slovak Republic  | 1 month to 16 years                                        | Randomised                                     | Clinical cure or improvement at 72 h or 14 days                                                                                            | Azithromycin: 85/89; ceftibuten: 62/74                                                                | In children with community-acquired respiratory tract infections, azithromycin had improved clinical efficacy over ceftibuten                                                   |
| Deivanayagam et al (1996) <sup>23</sup>     | India            | 5 months to 4 years                                        | Randomised                                     | Treatment failure: no clinical improvement at 72 h with regard to fever, tachypnea, or chest findings.                                     | Ampicillin: 19/52; penicillin and chloramphenicol: 5/49                                               | In hospitalised children with clinical and radiographic pneumonia, there was no significant difference in outcome between treatment groups                                      |
| Block et al (1995) <sup>24</sup>            | USA              | 3–12 years                                                 | Randomised                                     | No change or worsening of signs and symptoms                                                                                               | Clarithromycin: 3/124; erythromycin: 5/110                                                            | For children with chest radiographically confirmed pneumonia, there was no significant difference in outcome between the treatments                                             |
| Mulholland et al (1995) <sup>25</sup>       | Gambia           | 0–5 years                                                  | Randomised, double blind                       | Failure of therapy: death, evidence of pneumonia day 7 of treatment or at outpatient review (usually 2 weeks after initiation of therapy). | Co-trimoxazole: 16/73; chloramphenicol: 16/71                                                         | For malnourished children with pneumonia there was no significant difference in outcome between the two treatments                                                              |
| Keeley et al (1990) <sup>26</sup>           | Zimbabwe         | 3 months to 12 years                                       | Randomised, open label                         | Presentation to hospital between day 2 and 14 from start of therapy with pneumonia and radiological signs of pneumonia                     | Co-trimoxazole: 5/303; penicillin: 3/311                                                              | For children with non-severe pneumonia there was no significant difference in outcome between the two treatment groups                                                          |
| Jibril et al (1989) <sup>27</sup>           | Nigeria          | 2–12 years                                                 | Randomised, open label                         | Physician assessment of good or excellent response                                                                                         | Amoxicillin: 31/50; amoxicillin-clavulanic acid: 45/50                                                | In children with bacterial pneumonia there was a better response with amoxicillin-clavulanic acid than amoxicillin alone                                                        |
| Gatzola-Karaveli et al (1989) <sup>28</sup> | Switzerland      | 2–14 years                                                 | Randomised, open label                         | No apparent or incomplete clinical response to therapy or appearance of complications                                                      | Cefetamet (20 mg/kg daily): 0/11; cefetamet (40 mg/kg daily): 0/10; cefaclor (30 mg/kg daily): 1/10   | In children hospitalised with lower respiratory tract infections, there was only one treatment failure in cefaclor, but none receiving either dose of cefetamet                 |
| Campbell et al (1988) <sup>29</sup>         | Gambia           | 1 month to 4 years                                         | Not randomised                                 | Clinician at 14 days: outcome same or worse; mother at 14 days: no continuing problems.                                                    | Co-trimoxazole: clinician, 5/66; mother, 56/66; penicillin/ampicillin: clinician, 5/65; mother, 56/65 | In children with severe pneumonia, there was no significant difference in either outcome (mother's or physician's assessment) between the two treatment groups                  |
| Shann et al (1985) <sup>30</sup>            | Papua New Guinea | 93% were <24 months                                        | Randomised, open label, multicentre            | Death or change of antibiotics                                                                                                             | Chloramphenicol: 51/329; chloramphenicol and penicillin: 68/371                                       | In children with severe pneumonia, there was no significant difference in outcome in children receiving each treatment                                                          |

(Continues on next page)

| Study location                                                                                              | Age          | Study design         | Outcome measure                       | Antimicrobial agents (number with outcome/total)                                                                                 | Conclusions                                                                                              |                                                                                                                                                                                                                                                                              |
|-------------------------------------------------------------------------------------------------------------|--------------|----------------------|---------------------------------------|----------------------------------------------------------------------------------------------------------------------------------|----------------------------------------------------------------------------------------------------------|------------------------------------------------------------------------------------------------------------------------------------------------------------------------------------------------------------------------------------------------------------------------------|
| (Continued from previous page)                                                                              |              |                      |                                       |                                                                                                                                  |                                                                                                          |                                                                                                                                                                                                                                                                              |
| Haffejee (1984) <sup>31</sup>                                                                               | South Africa | 0–10 years           | Randomised, single blind              | Complete recovery at end of therapy                                                                                              | Cefotaxime: 1/15; penicillin + gentamicin: 2/15                                                          | For children with pneumonia, there was no significant difference in outcome between the two groups. The larger study included other diagnoses, which showed greater complete recovery in children in children taking cefotaxime versus penicillin-gentamicin.                |
| Friis et al (1984) <sup>32</sup>                                                                            | Denmark      | 1 month to 6 years   | Randomised, open label                | Multiple outcomes measured, only radiological signs at 3 weeks                                                                   | Antimicrobial treatment: 7/37; no antimicrobial (erythromycin if bacterial infection): 6/27              | For children with hospitalised pneumonia, there was no significant difference in outcome if the child received antimicrobials (ampicillin if <12 months or penicillin if >12 months) or no antimicrobials (unless signs of bacterial infection then erythromycin was given). |
| Hofmann et al (1996) <sup>33</sup>                                                                          | Germany      | 2–12 years           | Randomised, open label                | Presence of signs or symptoms of pneumonia on day 4 of therapy                                                                   | Azithromycin: 5/54; cefaclor: 14/55                                                                      | In non-hospitalised children with pneumonia, children treated with azithromycin had a lower proportion of signs or symptoms on day 4 than children treated with cefaclor.                                                                                                    |
| Amir et al (1996) <sup>34</sup>                                                                             | Israel       | 6 months to 5 years  | Randomised, open label                | No signs or symptoms of pneumonia after 11 days of therapy                                                                       | Cefixime: 28/29; amoxicillin-clavulanic acid: 29/33                                                      | In children with radiographically confirmed pneumonia and receiving 2 days of ceftriaxone, their subsequent oral antibiotic use did not show a significant difference in outcome.                                                                                            |
| Syrogianopolous et al (1994) <sup>35</sup>                                                                  | Greece       |                      | Randomised, open label                | Successful treatment                                                                                                             | Cefetamet (10 mg/kg): 80/81; cefetamet (20 mg/kg): 79/81; cefaclor (10 mg/kg): 71/75                     | In children with radiographically confirmed pneumonia, there was no significant difference between the three treatment outcomes.                                                                                                                                             |
| Sidal et al (1994) <sup>36</sup>                                                                            | Turkey       | 4 months to 14 years | Randomised, open label                | Respiratory symptoms and fever after the day 3 of treatment abnormal breath sounds on day 10                                     | Co-trimoxazole: 6/46; procaine penicillin: 5/63; benzathine then procaine penicillin: 14/42              | In children with non-severe pneumonia, there was no significant difference in outcome between the co-trimoxazole and the procaine penicillin group, and benzathine penicillin was not effective. Co-trimoxazole was cost effective.                                          |
| <b>Comparisons of dose and/or duration of the same antimicrobial agent</b>                                  |              |                      |                                       |                                                                                                                                  |                                                                                                          |                                                                                                                                                                                                                                                                              |
| Hazir et al (2007) <sup>37</sup>                                                                            | Pakistan     | 2–59 months          | Randomised, double blind              | Treatment failure on day 5: developed lower chest indrawing or danger signs                                                      | Amoxicillin (45 mg/kg daily): 417/437; amoxicillin (95 mg/kg daily): 414/439                             | Clinical outcome in children aged 2–59 months with non-severe pneumonia treated for 3 days is the same with standard and double-dose oral amoxicillin.                                                                                                                       |
| Rasmussen et al (2005) <sup>38</sup>                                                                        | Pakistan     | 2–59 months          | Randomised, double blind              | Treatment failure: change of therapy, death, or loss to follow-up.                                                               | Co-trimoxazole (4 mg/kg trimethoprim dose): 112/578; co-trimoxazole (8 mg/kg trimethoprim dose): 118/556 | For children with non-severe pneumonia, there was no difference in outcome between 4 mg/kg and 8 mg/kg dose groups.                                                                                                                                                          |
| Agarwal et al (2004) <sup>39</sup>                                                                          | India        | 2–59 months          | Randomised, double blind, multicentre | Cure: defined as no danger signs or respiratory rate below age specific cut-off on day 5                                         | Amoxicillin for 3 days: 980/1095; amoxicillin for 5 days: 983/1093                                       | In children with non-severe pneumonia, there was no significant difference in cure between a 3 or 5 day duration of therapy, and therefore both are equally effective.                                                                                                       |
| MASCOT (2002) <sup>40</sup>                                                                                 | Pakistan     | 2–59 months          | Randomised, double blind, multicentre | Treatment failure: needed a change in antimicrobial therapy, developed severe disease, did not improve, or died                  | Amoxicillin for 3 days: 209/1000; amoxicillin for 5 days: 202/1000                                       | In children with non-severe pneumonia, there was no significant difference between each treatment.                                                                                                                                                                           |
| Peltola et al (2001) <sup>41</sup>                                                                          | Finland      | 3 months to 15 years | Randomised, open label                | Treatment failure: change of antibiotic therapy or recurrence with discontinuation of therapy                                    | Cefuroxime or penicillin for 4 days: 3/34; cefuroxime or penicillin for 7 days: 1/38                     | In children with radiographically confirmed pneumonia, there was no significant difference between beta-lactam therapy (parental penicillin or cefuroxime) for 4 or 7 days. Study designed to test all severe illness, only cases with pneumonia are described here.         |
| Ficnar et al (1997) <sup>42</sup>                                                                           | Croatia      | 6 months to 12 years | Randomised, open label, multicentre   | Treatment failure: no improvement in chest radiograph or no complete resolution of symptoms at day 5 after initiation of therapy | Azithromycin for 3 days: 2/65; azithromycin for 5 days: 3/81                                             | For children with radiographically confirmed pneumonia, there was no significant difference between 3 or 5 days of therapy. Only cases with pneumonia are described here.                                                                                                    |
| Bocczazzi et al (1998) <sup>43</sup>                                                                        | Italy        | 2–12 years           | Randomised, open label                | Resolution of clinical signs and symptoms                                                                                        | Co-trimoxazole (4 mg/kg trimethoprim dose): 112/578; co-trimoxazole (8 mg/kg trimethoprim dose): 118/556 | For children with non-severe pneumonia, there was no difference between 4 mg/kg and 8 mg/kg dose groups.                                                                                                                                                                     |
| All included studies were randomised and had a clinical outcome.                                            |              |                      |                                       |                                                                                                                                  |                                                                                                          |                                                                                                                                                                                                                                                                              |
| <b>Webtable: Summary of studies comparing antimicrobial agents for the treatment of childhood pneumonia</b> |              |                      |                                       |                                                                                                                                  |                                                                                                          |                                                                                                                                                                                                                                                                              |

## References

- 1 Hazir T, Fox LM, Nisar YB, et al. Ambulatory short-course high-dose oral amoxicillin for treatment of severe pneumonia in children: a randomised equivalence trial. *Lancet* 2008; **371**: 49–56.
- 2 Bradley JS, Arguedas A, Blumer JL, Saez-Llorens X, Melkote R, Noel GJ. Comparative study of levofloxacin in the treatment of children with community-acquired pneumonia. *Pediatr Infect Dis J* 2007; **26**: 868–78.
- 3 Atkinson M, Lakhanpaul M, Smyth A, et al. Comparison of oral amoxicillin and intravenous benzyl penicillin for community acquired pneumonia in children (PIVOT trial): a multicentre pragmatic randomised controlled equivalence trial. *Thorax* 2007; **62**: 1102–06.
- 4 Lu Q, Chen HZ, Zhang LE, Qing M, Yang YJ. A prospective multi-center randomized parallel study on efficacy and safety of cefaclor vs. amoxicillin–clavulanate in children with acute bacterial infection of lower respiratory tract. *Chin J Infect Chemother* 2006; **6**: 77–81.
- 5 Bansal A, Singhi SC, Jayashree M. Penicillin and gentamicin therapy vs amoxicillin/clavulanate in severe hypoxemic pneumonia. *Indian J Pediatr* 2006; **73**: 305–09.
- 6 Hasali MA, Ibrahim MI, Sulaiman SA, Ahmad Z, Hasali JB. A clinical and economic study of community-acquired pneumonia between single versus combination therapy. *Pharm World Sci* 2005; **27**: 249–53.
- 7 Cetinkaya F, Gogremis A, Kutluk G. Comparison of two antibiotic regimens in the empirical treatment of severe childhood pneumonia. *Indian J Pediatr* 2004; **71**: 969–72.
- 8 Addo-Yobo E, Chisaka N, Hassan M, et al. Oral amoxicillin versus injectable penicillin for severe pneumonia in children aged 3 to 59 months: a randomised multicentre equivalence study. *Lancet* 2004; **364**: 1141–48.
- 9 Aurangzeb B, Hameed A. Comparative efficacy of amoxicillin, cefuroxime and clarithromycin in the treatment of community-acquired pneumonia in children. *J Coll Physicians Surg Pak* 2003; **13**: 704–07.
- 10 Kogan R, Martínez MA, Rubilar L, et al. Comparative randomized trial of azithromycin versus erythromycin and amoxicillin for treatment of community-acquired pneumonia in children. *Pediatr Pulmonol* 2003; **35**: 91–98.
- 11 Duke T, Poka H, Dale F, Michael A, Mgone J, Wal T. Chloramphenicol versus benzylpenicillin and gentamicin for the treatment of severe pneumonia in children in Papua New Guinea: a randomised trial. *Lancet* 2002; **359**: 474–80.
- 12 CATCHUP Study Group. Clinical efficacy of co-trimoxazole versus amoxicillin twice daily for treatment of pneumonia: a randomised controlled clinical trial in Pakistan. *Arch Dis Child* 2002; **86**: 113–18.
- 13 Ferwerda A, Moll HA, Hop WC, et al. Efficacy, safety and tolerability of 3 day azithromycin versus 10 day co-amoxiclav in the treatment of children with acute lower respiratory tract infections. *J Antimicrob Chemother* 2001; **47**: 441–46.
- 14 Vuori-Holopainen E, Peltola H, Kallio MJ. Narrow- versus broad-spectrum parenteral antimicrobials against common infections of childhood: a prospective and randomised comparison between penicillin and cefuroxime. *Eur J Pediatr* 2000; **159**: 878–84.
- 15 Boulesteix J, Olivier C, Mselati JC, et al. Lower respiratory tract infections in children: compared efficacy of cefuroxime axetil and cefpodoxime proxetil. *Med Mal Infect* 2000; **30**: 581–87.
- 16 Wubbel L, Muniz L, Ahmed A, et al. Etiology and treatment of community-acquired pneumonia in ambulatory children. *Pediatr Infect Dis J* 1999; **18**: 98–104.
- 17 Harris JA, Kolokathis A, Campbell M, Cassell GH, Hammerschlag MR. Safety and efficacy of azithromycin in the treatment of community-acquired pneumonia in children. *Pediatr Infect Dis J* 1998; **17**: 865–71.
- 18 Tsarouhas N, Shaw KN, Hodinka RL, Bell LM. Effectiveness of intramuscular penicillin versus oral amoxicillin in the early treatment of outpatient pediatric pneumonia. *Pediatr Emerg Care* 1998; **14**: 338–41.
- 19 Straus WL, Qazi SA, Kundi Z, Nomani NK, Schwartz B. Antimicrobial resistance and clinical effectiveness of co-trimoxazole versus amoxicillin for pneumonia among children in Pakistan: randomised controlled trial. *Lancet* 1998; **352**: 270–74.
- 20 Camargos PA, Guimaraes MD, Ferreira CS. Benzathine penicillin for unilateral lobar or segmental infiltrates presumptively caused by *Streptococcus pneumoniae* in children 2–12 years old. *J Trop Pediatr* 1997; **43**: 353–60.
- 21 Roord JJ, Wolf BH, Gossens MM, Kimpen JL. Prospective open randomized study comparing efficacies and safeties of a 3-day course of azithromycin and a 10-day course of erythromycin in children with community-acquired acute lower respiratory tract infections. *Antimicrob Agents Chemother* 1996; **40**: 2765–68.
- 22 Galova K, Sufliarska S, Kukova Z, et al. Multicenter randomized study of two once daily regimens in the initial management of community-acquired respiratory tract infections in 163 children: azithromycin versus cefibuten. *Chemotherapy* 1996; **42**: 231–34.
- 23 Deivanayagam N, Nedunchelian K, Ashok TP, Mala N, Sheela D, Rathnam SR. Effectiveness of ampicillin and combination of penicillin and chloramphenicol in the treatment of pneumonias: randomized controlled trial. *Indian Pediatr* 1996; **33**: 813–16.
- 24 Block S, Hedrick J, Hammerschlag MR, Cassell GH, Craft JC. *Mycoplasma pneumoniae* and *Chlamydia pneumoniae* in pediatric community-acquired pneumonia: comparative efficacy and safety of clarithromycin vs. erythromycin ethylsuccinate. *Pediatr Infect Dis J* 1995; **14**: 471–77.
- 25 Mulholland EK, Falade AG, Corrah PT, et al. A randomized trial of chloramphenicol vs. trimethoprim–sulfamethoxazole for the treatment of malnourished children with community-acquired pneumonia. *Pediatr Infect Dis J* 1995; **14**: 959–65.
- 26 Keeley DJ, Nkrumah FK, Kapuyanyika C. Randomized trial of sulfamethoxazole + trimethoprim versus procaine penicillin for the outpatient treatment of childhood pneumonia in Zimbabwe. *Bull World Health Organ* 1990; **68**: 185–92.
- 27 Jibril HB, Ifere OA, Odumah DU. An open, comparative evaluation of amoxycillin and amoxycillin plus clavulanic acid ('Augmentin') in the treatment of bacterial pneumonia in children. *Curr Med Res Opin* 1989; **11**: 585–92.
- 28 Gatzola-Karaveli M, Vogiatzis N, Rousso I, Sklavuno-Tsurutsoglu S, Germano G, Kissling M. Cefetamet pivoxil in paediatric patients suffering from lower respiratory tract infections. *Pharmatherapeutica* 1989; **5**: 423–28.
- 29 Campbell H, Byass P, Forgie IM, O'Neill KP, Lloyd-Evans N, Greenwood BM. Trial of co-trimoxazole versus procaine penicillin with ampicillin in treatment of community-acquired pneumonia in young Gambian children. *Lancet* 1988; **2**: 1182–84.
- 30 Shann F, Barker J, Poore P. Chloramphenicol alone versus chloramphenicol plus penicillin for severe pneumonia in children. *Lancet* 1985; **2**: 684–86.
- 31 Haffeejee IE. A therapeutic trial of cefotaxime versus penicillin-gentamicin for severe infections in children. *J Antimicrob Chemother* 1984; **14** (suppl B): 147–52.
- 32 Friis B, Andersen P, Brenoe E, et al. Antibiotic treatment of pneumonia and bronchiolitis. A prospective randomised study. *Arch Dis Child* 1984; **59**: 1038–45.
- 33 Hofmann D, Schafer V, Springsklee M. Treatment of children with bacterial lower respiratory tract infections—results of a comparative study of azithromycin vs. cefaclor. *Munch Med Wochenschr* 1996; **138**: 358–63.
- 34 Amir J, Harel L, Eidlitz-Markus T, Varsano I. Comparative evaluation of cefixime versus amoxicillin-clavulanate following ceftriaxone therapy of pneumonia. *Clin Pediatr (Phila)* 1996; **35**: 629–33.
- 35 Syrogiannopoulos GA, Chibante AM, Gatzola M, et al. Cefetamet pivoxil in the treatment of community-acquired pneumonia in children. *Drug Invest* 1994; **8**: 31–37.
- 36 Sidal M, Oguz F, Unuvar A, Sarbat G, Neyzi O. Trial of co-trimoxazole versus procaine penicillin G and benzathine penicillin + procaine penicillin G in the treatment of childhood pneumonia. *J Trop Pediatr* 1994; **40**: 301–04.
- 37 Hazir T, Qazi SA, Bin Nisar Y, et al. Comparison of standard versus double dose of amoxicillin in the treatment of non-severe pneumonia in children aged 2–59 months: a multi-centre, double blind, randomised controlled trial in Pakistan. *Arch Dis Child* 2007; **92**: 291–97.
- 38 Rasmussen ZA, Bari A, Qazi S, et al. Randomized controlled trial of standard versus double dose cotrimoxazole for childhood pneumonia in Pakistan. *Bull World Health Organ* 2005; **83**: 10–19.

- 39 Agarwal G, Awasthi S, Kabra SK, et al. Three day versus five day treatment with amoxicillin for non-severe pneumonia in young children: a multicentre randomised controlled trial. *BMJ* 2004; **328**: 791–97.
- 40 Pakistan Multicentre Amoxicillin Short Course Therapy (MASCOT) pneumonia study group. Clinical efficacy of 3 days versus 5 days of oral amoxicillin for treatment of childhood pneumonia: a multicentre double-blind trial [published erratum in *Lancet* 2003; **361**: 788]. *Lancet* 2002; **360**: 835–41.
- 41 Peltola H, Vuori-Holopainen E, Kallio MJ. Successful shortening from seven to four days of parenteral beta-lactam treatment for common childhood infections: a prospective and randomized study. *Int J Infect Dis* 2001; **5**: 3–8.
- 42 Ficnar B, Huzjak N, Oreskovic K, Matrapazovski M, Klinar I. Azithromycin: 3-day versus 5-day course in the treatment of respiratory tract infections in children. Croatian Azithromycin Study Group. *J Chemother* 1997; **9**: 38–43.
- 43 Boccazzi A, Tonelli P, Bellosta C, Careddu P. Clinical and pharmacological evaluation of a modified cefotaxime bid regimen versus traditional tid in pediatric lower respiratory tract infections. *Diagn Microbiol Infect Dis* 1998; **32**: 265–72.
